# Supplementary material for: The Preparation of Monomer Casting Polyamide 6/Thermotropic Liquid Crystalline Polymer Composite Materials with Satisfactory Miscibility
Source: MDPI journal article supplement (doi:10.3390/polym14204355), 2022-10-16
Supplement: s1 [file s1]

*Supplementary Materials*

# **The Preparation of Monomer Casting Polyamide 6/Thermotropic Liquid Crystalline Polymer Composite Materials with Satisfactory Miscibility**

**Mingmin Li <sup>1</sup>, Jiahao Qiu <sup>2</sup>, Yifei Yue <sup>2</sup>, Jingbing Liu <sup>3,\*</sup> and Baohua Zhang <sup>2,\*</sup>**

<sup>1</sup> National-certified Enterprise Technology Center, Kingfa Science and Technology Co., Ltd., Guangzhou 510705, China

<sup>2</sup> Guangzhou Key Laboratory of Sensing Materials & Devices, Center for Advanced Analytical Science, c/o School of Chemistry and Chemical Engineering, Guangzhou University, Guangzhou 510006, China

<sup>3</sup> Faculty of Materials and Manufacturing, Beijing University of Technology, Beijing 100124, China

\* Correspondence: liujingbing@bjut.edu.cn (J.L.); ccbhzhang@gzhu.edu.cn (B.Z.)

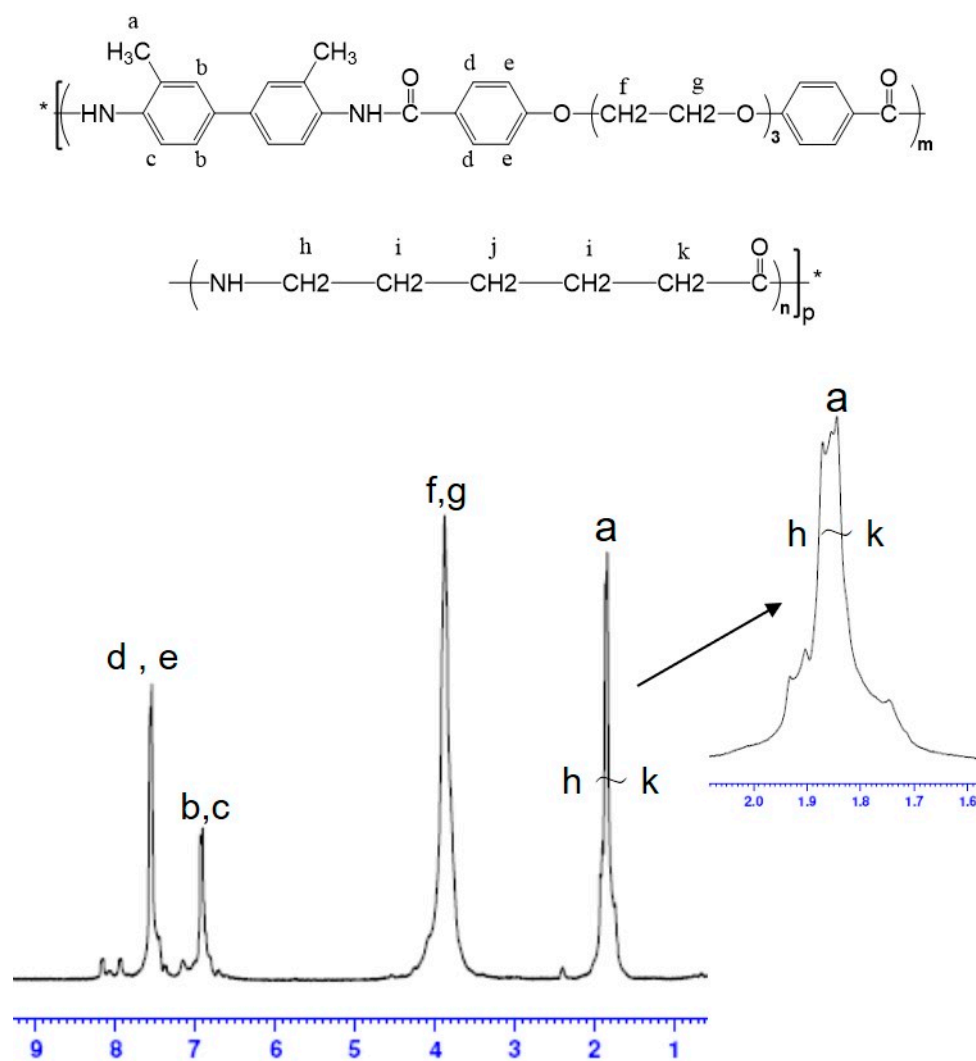

**Figure S1.**  $^1\text{H}$  NMR spectra of the TLCP-PA6 copolymer.

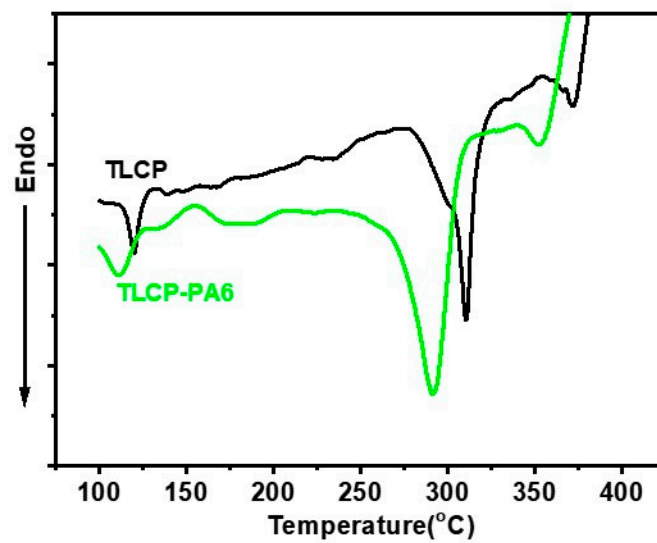

**Figure S2.** DSC curves of TLCP and TLCP-PA6 samples (the first heating).
